# Supplementary material for: Orobanche crenata Forssk. Extract Affects Human Breast Cancer Cell MCF-7 Survival and Viral Replication
Source: MDPI journal article supplement (doi:10.3390/cells11101696), 2022-05-19
Supplement: s1 [file s1]

## Supplementary Materials

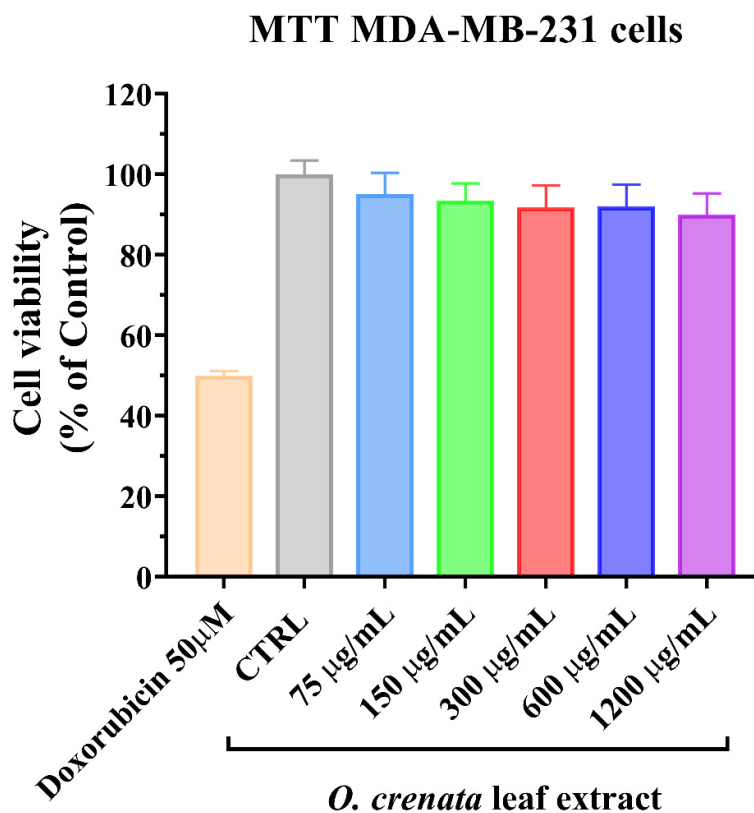

**Figure S1.** Cell viability of MDA-MB-231 cells untreated (control; CTRL) and treated for 24 h with increasing concentrations (from 75 to 1200 µg/mL) of *O. crenata* leaf extract. Experiments were performed using Doxorubicin as standard cytotoxic compound. The IC<sub>50</sub> of the standard agent was 50±1.1µM. Values are the mean ± SD of four experiments in triplicate.

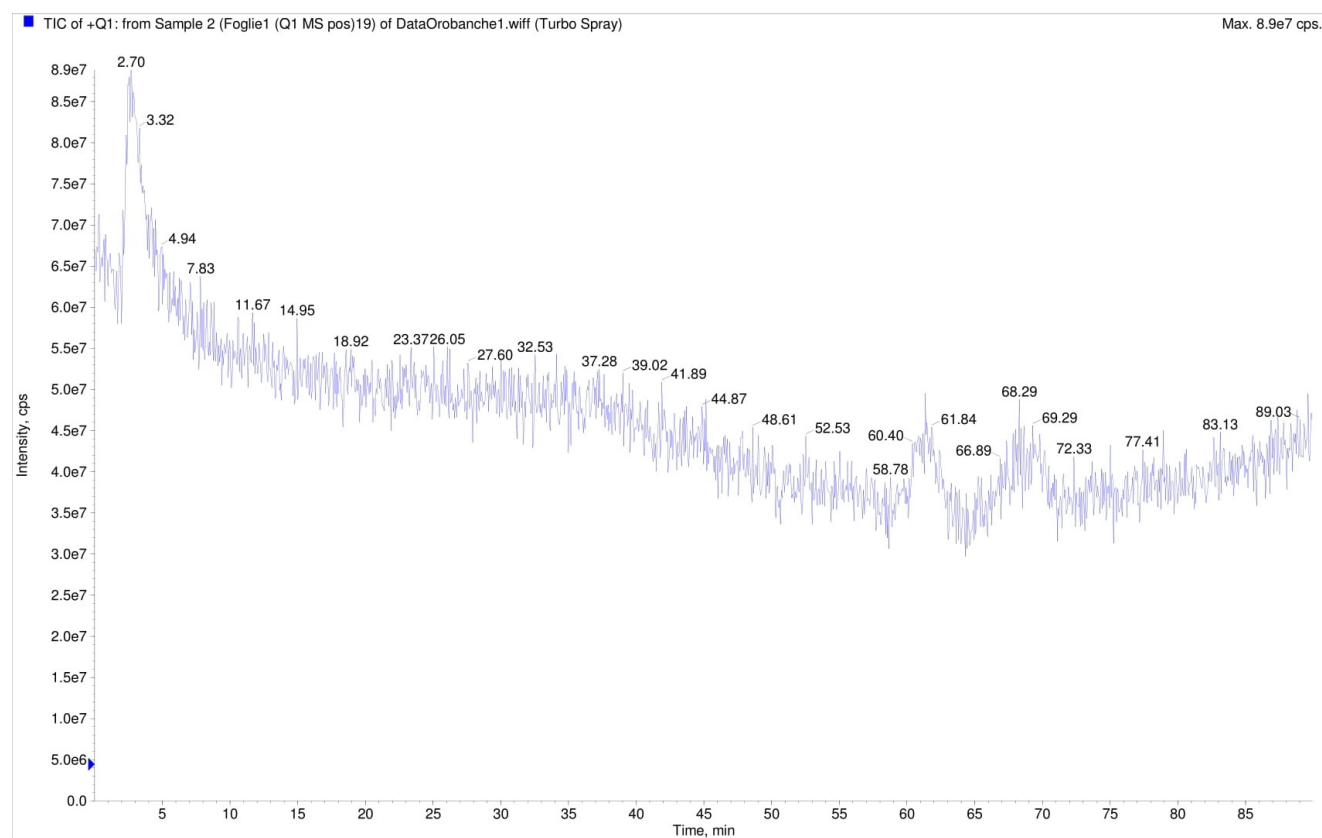

**Figure S2.** Mass spectrum of *Orobancha crenata* leaf extract (positive polarity – Q1 mode). In x-axis is reported the retention time (min).

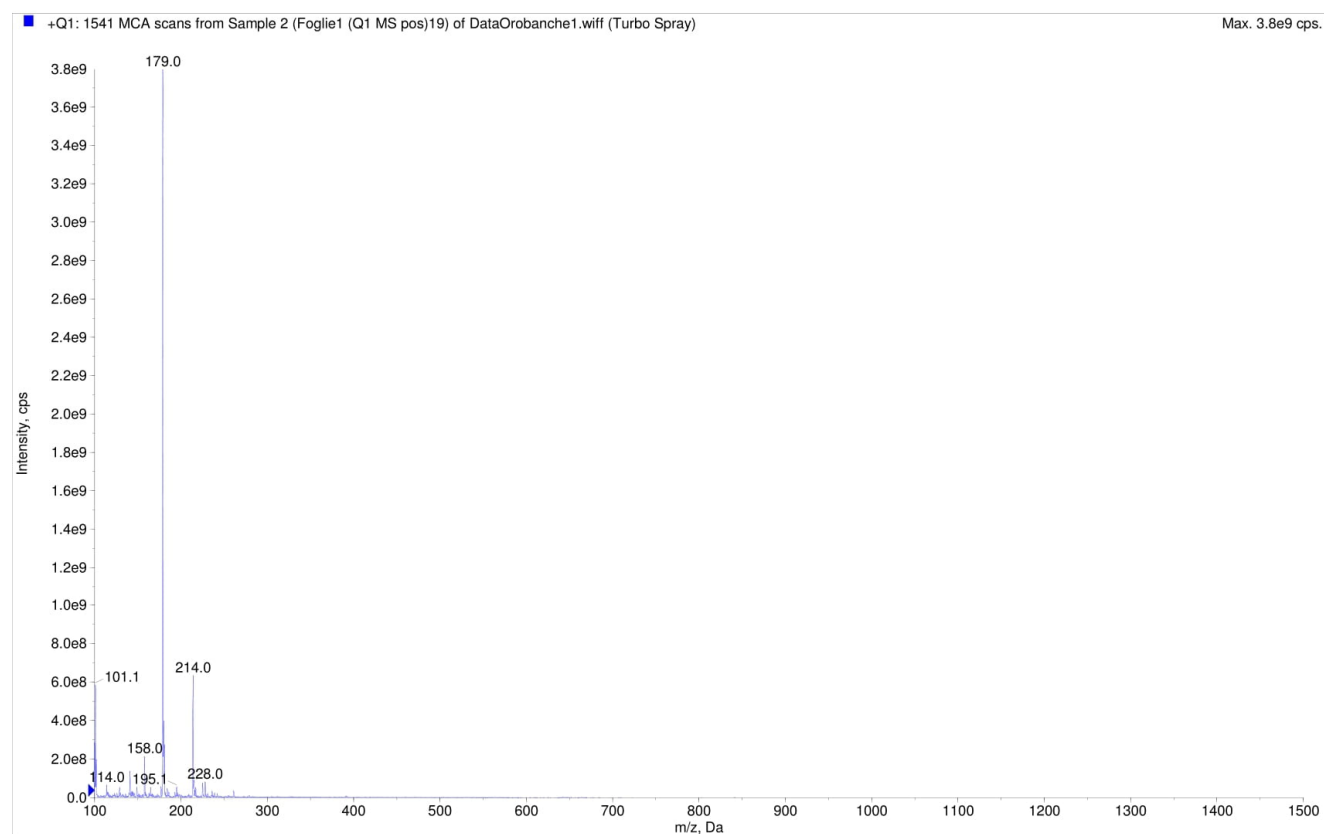

**Figure S3.** Mass spectrum of *Orobanchae1.wiff* leaf extract (positive polarity – Q1 mode). In x-axis is reported the mass-to-charge ratio (m/z) from 100 to 1500 Da.

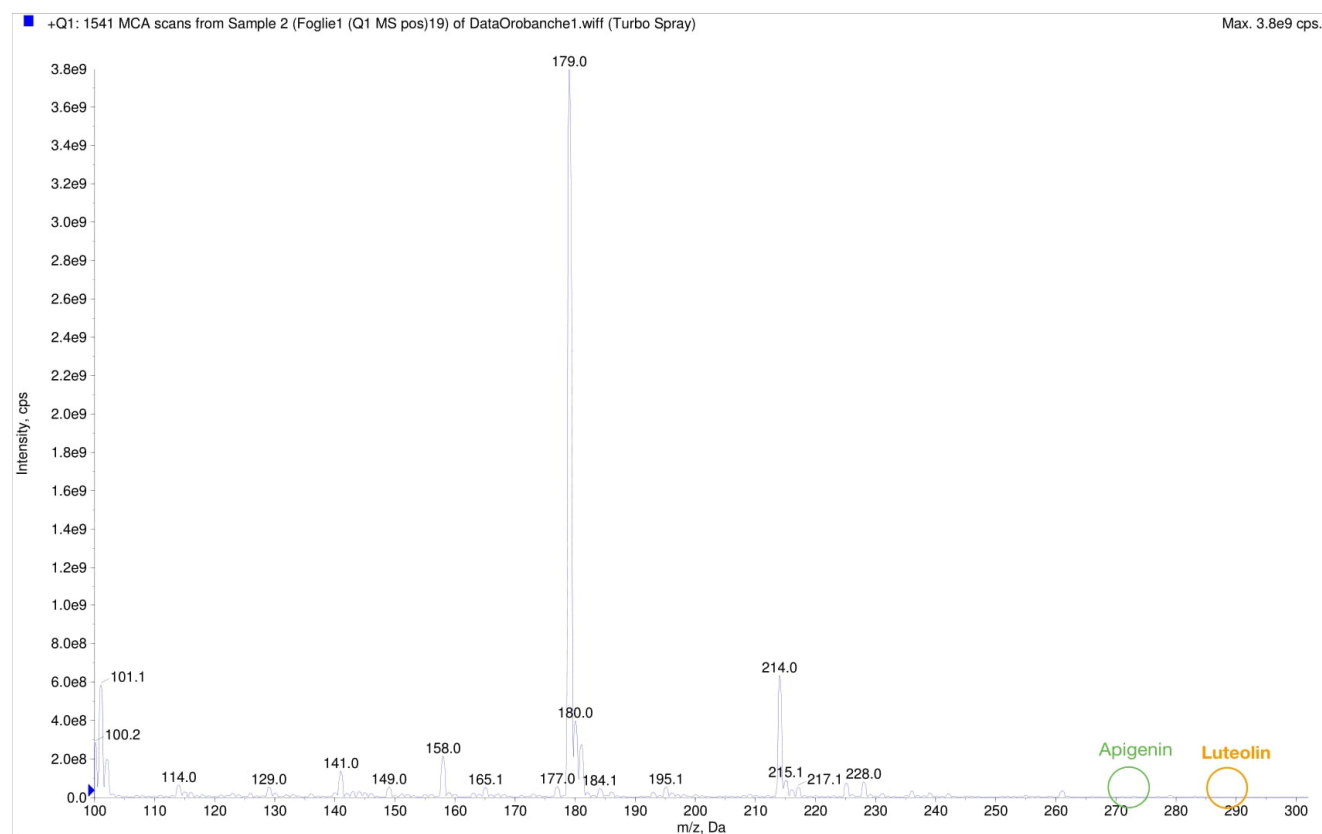

**Figure S4.** Mass spectrum of *Orobanche crenata* leaf extract (positive polarity – Q1 mode). In x-axis is reported the mass-to-charge ratio ( $m/z$ ) from 100 to 300 Da.

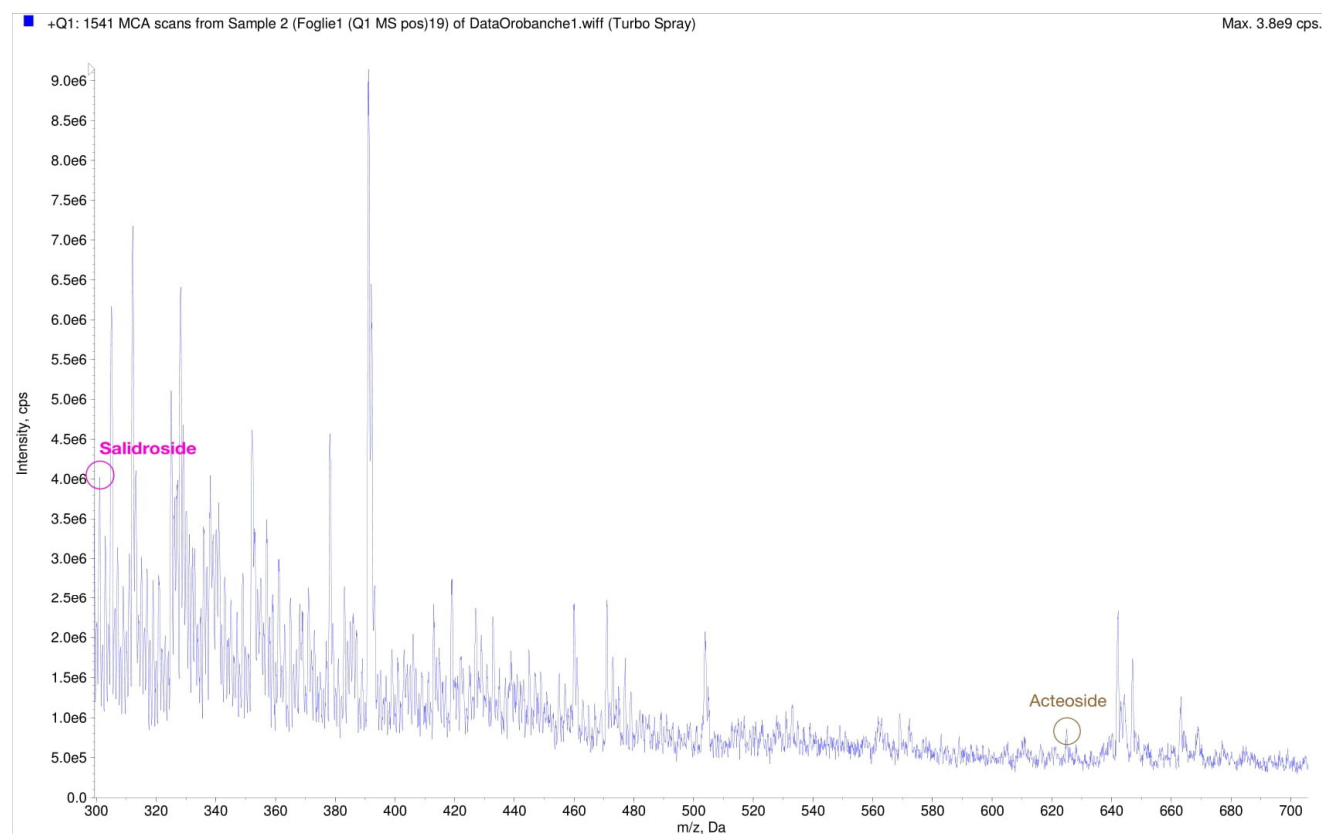

**Figure S5.** Mass spectrum of *Orobanchia crenata* leaf extract (positive polarity – Q1 mode). In x-axis is reported the mass-to-charge ratio ( $m/z$ ) from 300 to 700 Da.

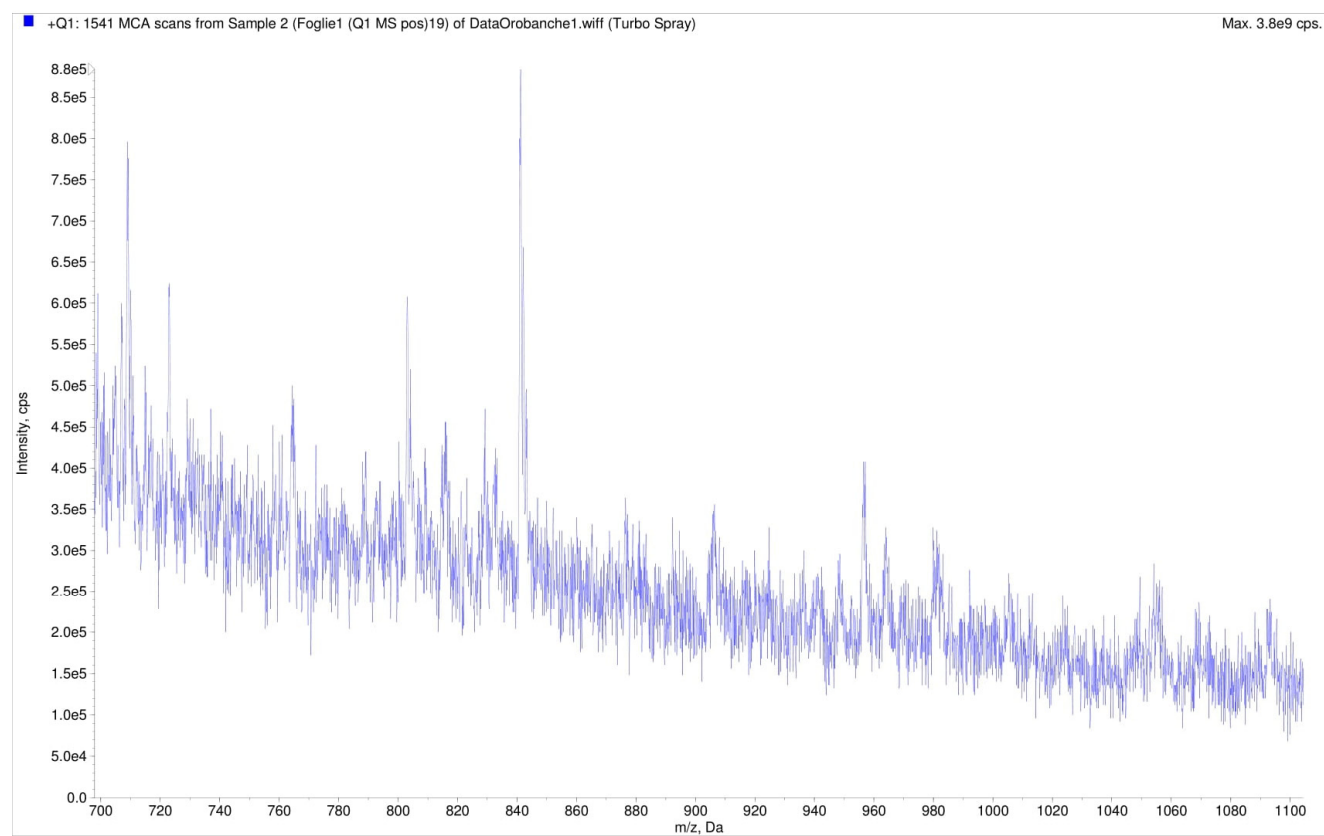

**Figure S6.** Mass spectrum of *Orobanchae crenata* leaf extract (positive polarity – Q1 mode). In x-axis is reported the mass-to-charge ratio (m/z) from 700 to 1100 Da.

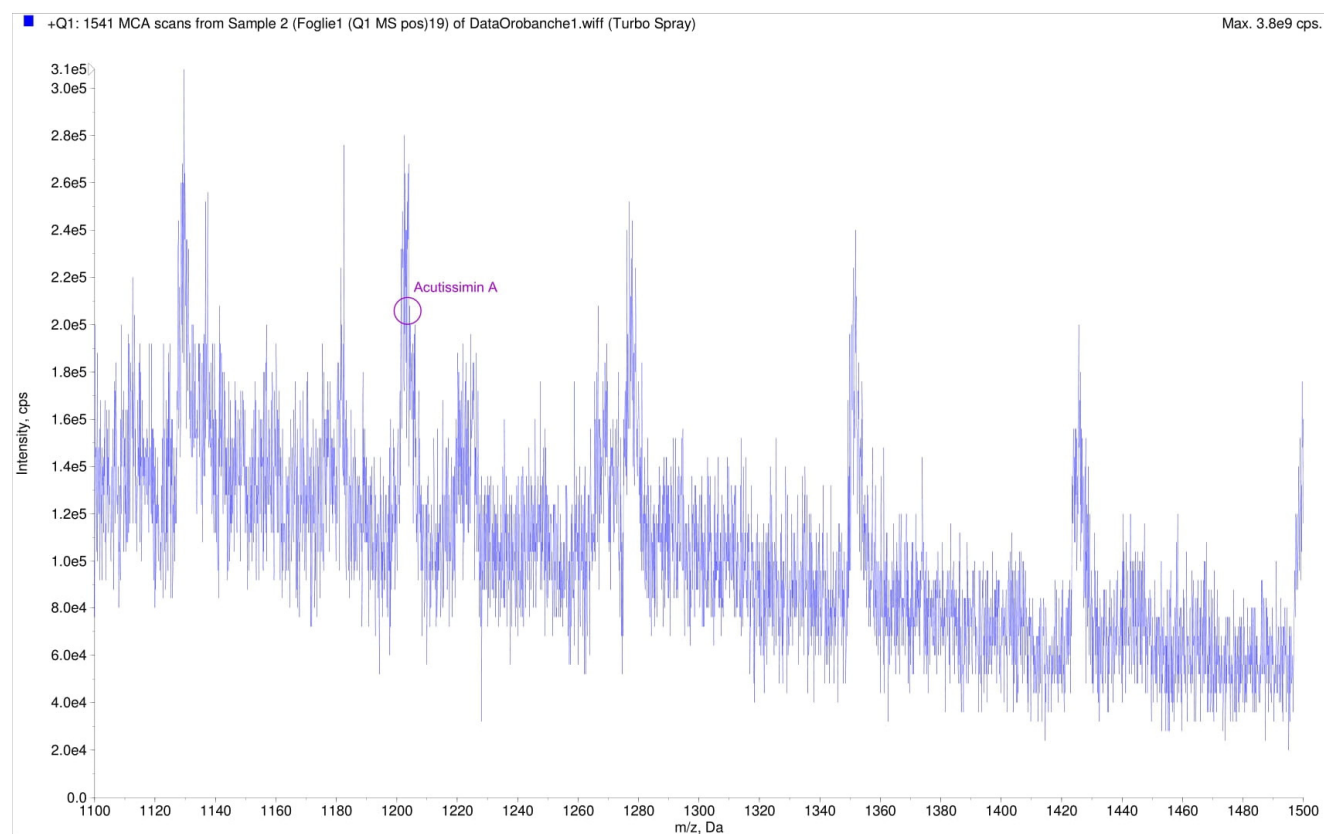

**Figure S7.** Mass spectrum of *Orobanch crenata* leaf extract (positive polarity – Q1 mode). In x-axis is reported the mass-to-charge ratio (m/z) from 1100 to 1500 Da.

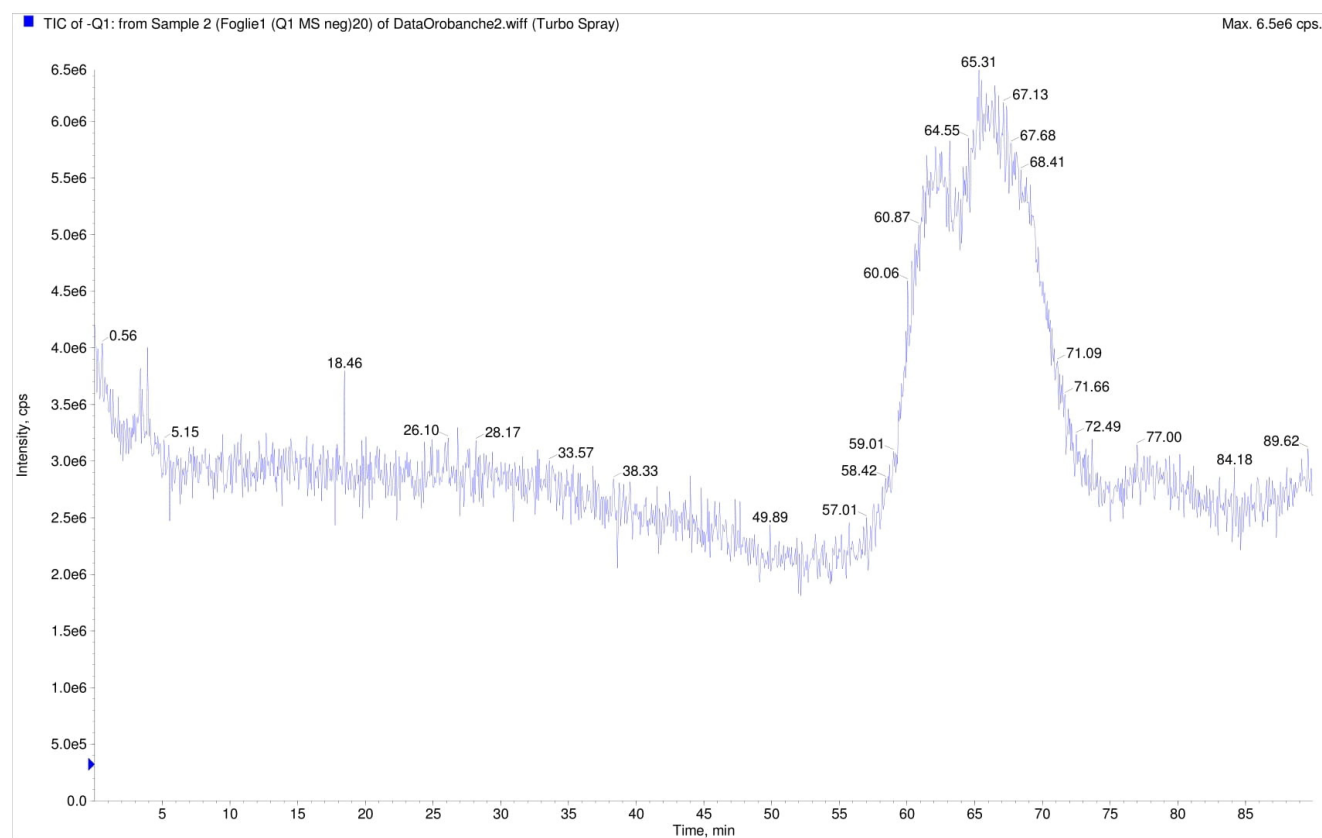

**Figure S8.** Mass spectrum of *Orobancha crenata* leaf extract (negative polarity – Q1 mode). In x-axis is reported the retention time (min).



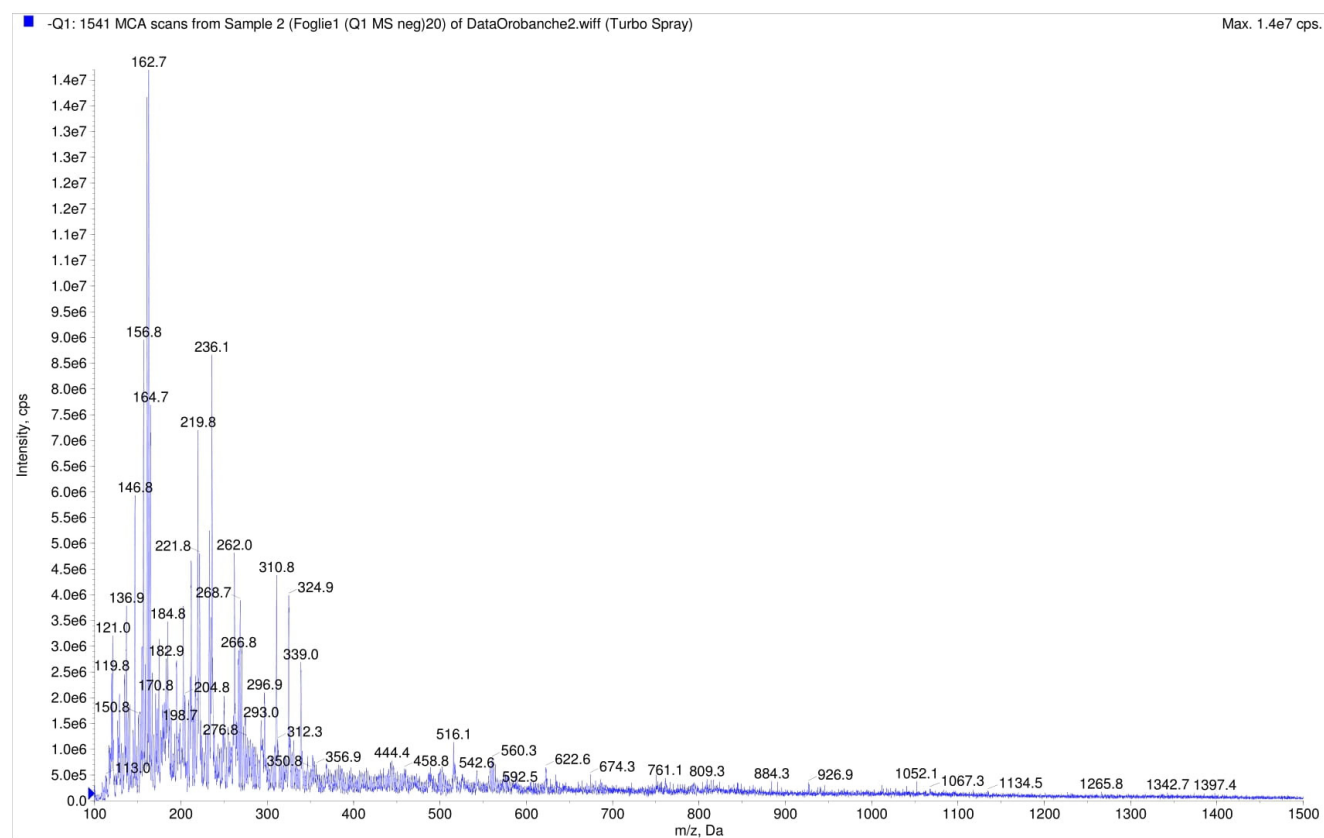

**Figure S9.** Mass spectrum of *Orobanche crenata* leaf extract (negative polarity – Q1 mode). In x-axis is reported the mass-to-charge ratio (m/z) from 100 to 1500 Da.

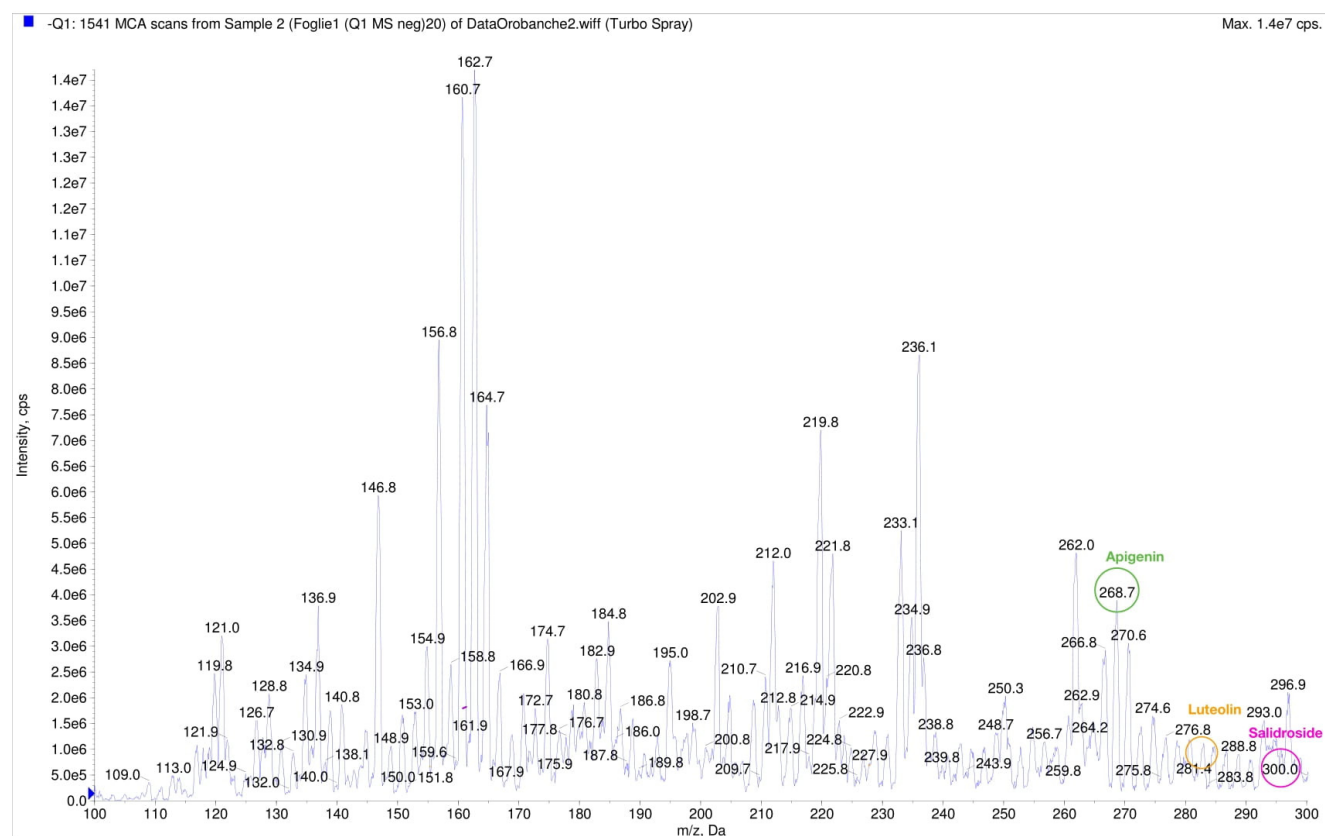

**Figure S10.** Mass spectrum of *Orobanch crenata* leaf extract (negative polarity – Q1 mode). In x-axis is reported the mass-to-charge ratio (m/z) from 100 to 300 Da.

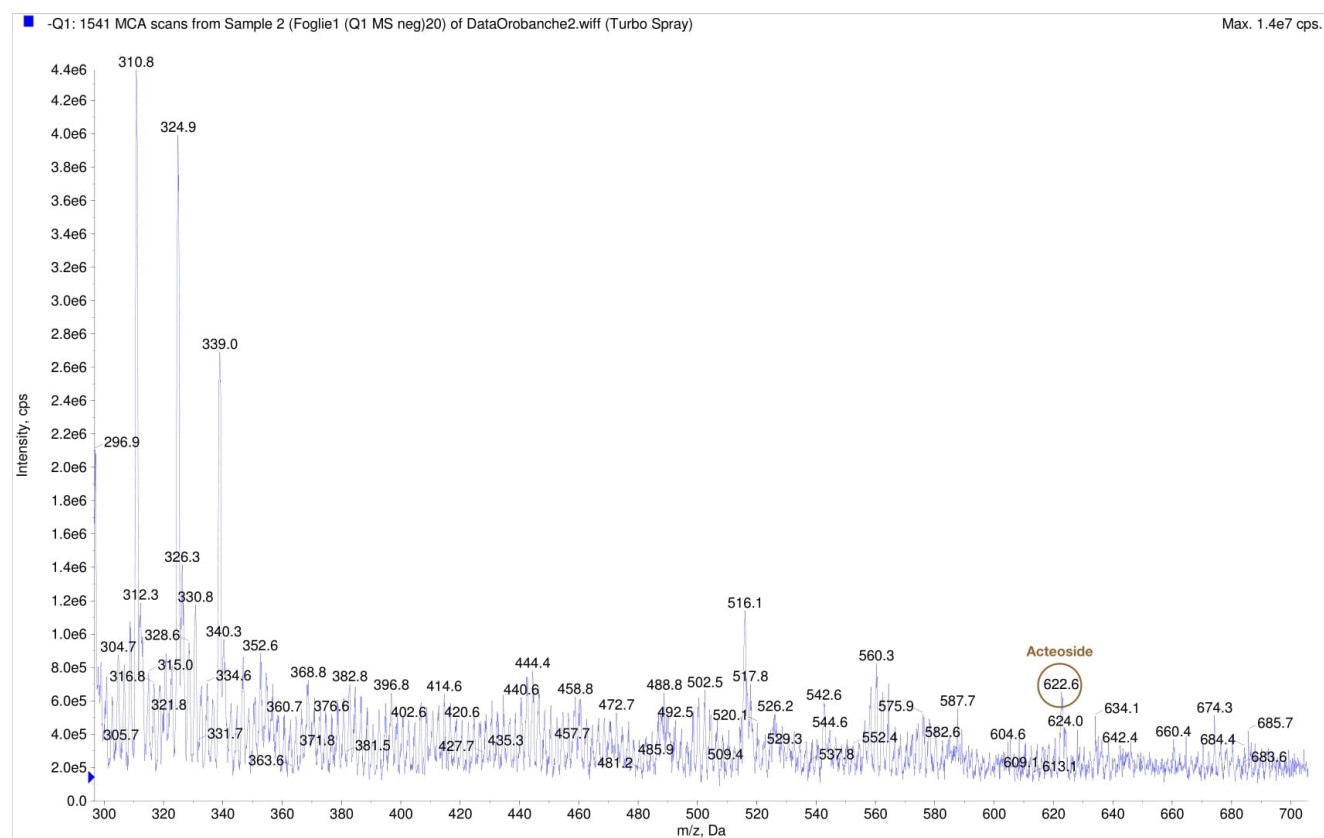

**Figure S11.** Mass spectrum of *Orobanch crenata* leaf extract (negative polarity – Q1 mode). In x-axis is reported the mass-to-charge ratio (m/z) from 300 to 700 Da.

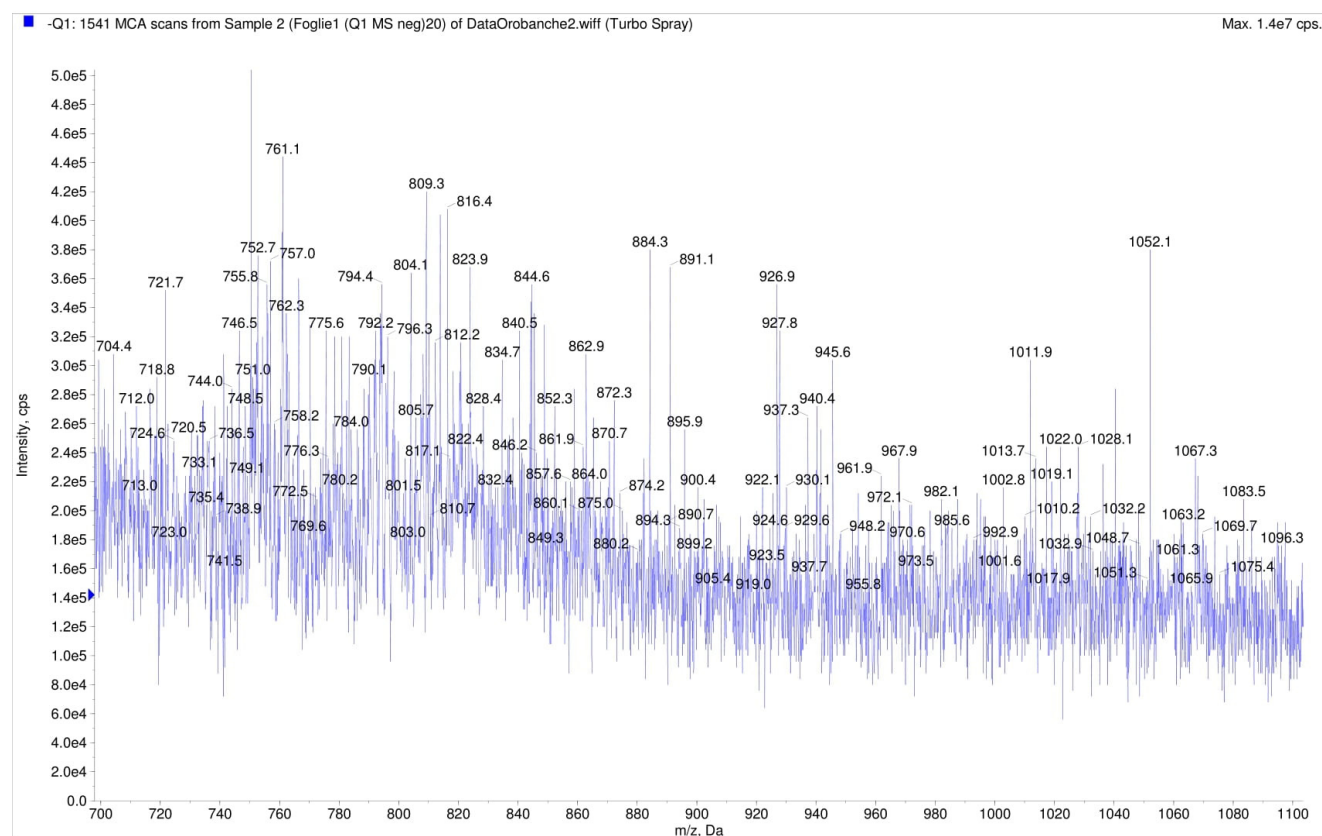

**Figure S12.** Mass spectrum of *Orobanch crenata* leaf extract (negative polarity – Q1 mode). In x-axis is reported the mass-to-charge ratio (m/z) from 700 to 1100 Da.

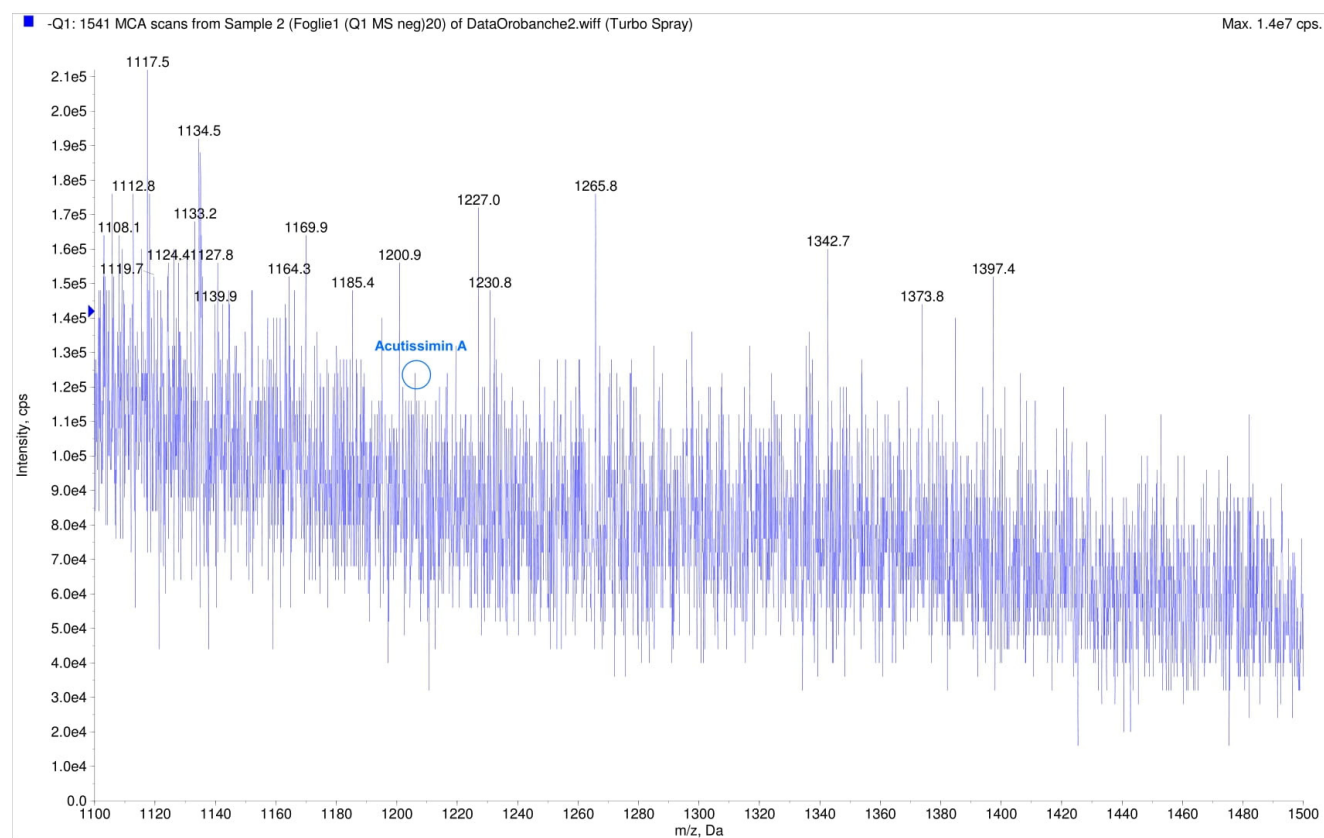

**Figure S13.** Mass spectrum of *Orobanch crenata* leaf extract (negative polarity – Q1 mode). In x-axis is reported the mass-to-charge ratio (m/z) from 1100 to 1500 Da.
